# Supplementary material for: Mechano-chemical synthesis of nanostructured FePO4/MWCNTs composites as cathode materials for lithium-ion batteries
Source: Royal Society of Chemistry journal article supplement (doi:10.1039/c4ta04295f), 2014-01-01
Supplement: c4ta04295f1.pdf [file c4ta04295f1.pdf]

Electronic Supplementary Information (ESI) for Journal of Materials Chemistry A  
This journal is © The Royal Society of Chemistry 2014

## Electronic Supplementary Information (ESI)

### **Mechano-chemical Synthesis of Nanostructured FePO<sub>4</sub>/MWCNTs Composites as Cathode Materials for Lithium-ion Batteries**

Hui Dou,<sup>a,b</sup> Ping Nie,<sup>a</sup> and Douglas R. MacFarlane <sup>\*b</sup>

<sup>a</sup>College of Material Science and Engineering, Nanjing University of Aeronautics and Astronautics,  
Nanjing, China

<sup>b</sup>Australian Centre for Electromaterials Science, Monash University, Clayton, Victoria 3800, Australia.

Fax: +61-3-99054597; Tel: +61-3- 99054540; E-mail: douglas.macfarlane@monash.edu

**Table S1** Comparison of the FePO<sub>4</sub>/MWCNTs with other FePO<sub>4</sub>/CNTs based materials reported recently.

| Procedures                            | Properties                                                                                                                                             |                                                                                                                                                                                   | Performance                                                                                                                                                                                  | References |
|---------------------------------------|--------------------------------------------------------------------------------------------------------------------------------------------------------|-----------------------------------------------------------------------------------------------------------------------------------------------------------------------------------|----------------------------------------------------------------------------------------------------------------------------------------------------------------------------------------------|------------|
|                                       | Merits                                                                                                                                                 | Demerits                                                                                                                                                                          |                                                                                                                                                                                              |            |
| DNA-directed growth                   | Ultrasmall nanoparticles with size of ~5 nm                                                                                                            | <ol style="list-style-type: none"> <li>1. Complicated process</li> <li>2. Multi-step</li> <li>3. Time-consuming</li> <li>4. Very low pH</li> </ol>                                | 132 mAh g <sup>-1</sup> at 1C<br>88 mAh g <sup>-1</sup> at 5C<br>excellent stability                                                                                                         | Ref. 1     |
| Aqueous solution-based method         | FePO <sub>4</sub> ·H <sub>2</sub> O/carbon nanotube coaxial nanocomposite                                                                              | Required calcination                                                                                                                                                              | 157 mAh g <sup>-1</sup> at 12.5 mA g <sup>-1</sup><br>146 mAh g <sup>-1</sup> at 625 mA g <sup>-1</sup><br>61 mAh g <sup>-1</sup> at 15 A g <sup>-1</sup>                                    | Ref. 2     |
| Aqueous solution-based mineralization | <ol style="list-style-type: none"> <li>1. Low temperature</li> <li>2. Core-shell FePO<sub>4</sub>@MCNT nanowire</li> </ol>                             | <ol style="list-style-type: none"> <li>1. Complicated process</li> <li>2. Multi-step</li> <li>3. Time-consuming</li> <li>4. Low yield</li> <li>5. Required calcination</li> </ol> | 175 mAh g <sup>-1</sup> at 20 mA g <sup>-1</sup><br>excellent stability                                                                                                                      | Ref. 3     |
| Hydrothermal approach                 | <ol style="list-style-type: none"> <li>1. Low temperature</li> <li>2. One-pot</li> </ol>                                                               | <ol style="list-style-type: none"> <li>1. The addition of surfactant</li> <li>2. With a diameter of 30-300 nm</li> </ol>                                                          | 120 mAh g <sup>-1</sup> at 10 mA g <sup>-1</sup><br>70 mAh g <sup>-1</sup> at 20 mA g <sup>-1</sup><br>55 mAh g <sup>-1</sup> at 60 mA g <sup>-1</sup><br>(cathode for sodium-ion batteries) | Ref. 4     |
| Microemulsion technique               | <ol style="list-style-type: none"> <li>1. Nanoparticle with uniform size-distribution</li> <li>2. Core-shell FePO<sub>4</sub>@MCNT nanowire</li> </ol> | <ol style="list-style-type: none"> <li>1. The addition of surfactant</li> <li>2. Complicated process</li> <li>3. Required calcination</li> </ol>                                  | 155.2 mAh g <sup>-1</sup> at 0.1C<br>133.2 mAh g <sup>-1</sup> at 0.3C<br>75.3 mAh g <sup>-1</sup> at 1C<br>(cathode for sodium-ion batteries)                                               | Ref. 5     |
| Mechano-chemical Synthesis            | <ol style="list-style-type: none"> <li>1. Room temperature</li> <li>2. Simple process</li> <li>3. High yield</li> </ol>                                | <ol style="list-style-type: none"> <li>1. Relatively expensive ionic liquid</li> <li>2. Without formation of core-shell structure</li> </ol>                                      | 143 mAh g <sup>-1</sup> at 40 mA g <sup>-1</sup><br>excellent stability                                                                                                                      | This work  |

## References

1. C. X. Guo, Y. Q. Shen, Z. L. Dong, X. D. Chen, X. W. Lou and C. M. Li, *Energy Environ. Sci.*, 2012, **5**, 6919-6922.
2. J. P. Jegal, J. G. Kim and K. B. Kim, *Electrochem. Commun.*, 2013, **30**, 87-90.

3. S. W. Kim, J. Ryu, C. B. Park and K. Kang, *Chem. Commun.*, 2010, **46**, 7409-7411.
4. Y. Liu, Y. Xu, X. Han, C. Pellegrinelli, Y. Zhu, H. Zhu, J. Wan, A. C. Chung, O. Vaaland, C. Wang and L. Hu, *Nano Lett.*, 2012, **12**, 5664-5668.
5. S. Xu, S. Zhang, J. Zhang, T. Tan and Y. Liu, *J. Mater. Chem. A*, 2014, **2**, 7221-7228.
